# Supplementary material for: Interpretable machine learning reveals a diverse arsenal of anti-defenses in 1 bacterial viruses
Source: Research Square preprint supplement (doi:10.21203/rs.3.rs-4571006/v1), 2024-07-17
Supplement: Supplementary file 1 [file c917516d358e69c65f275899.pdf]

**Extended Data Figure 1. Associating bacterial defenses to putative viral anti-defense genes**  
**is limited by the high number of defenses co-occurring in bacterial genomes.**

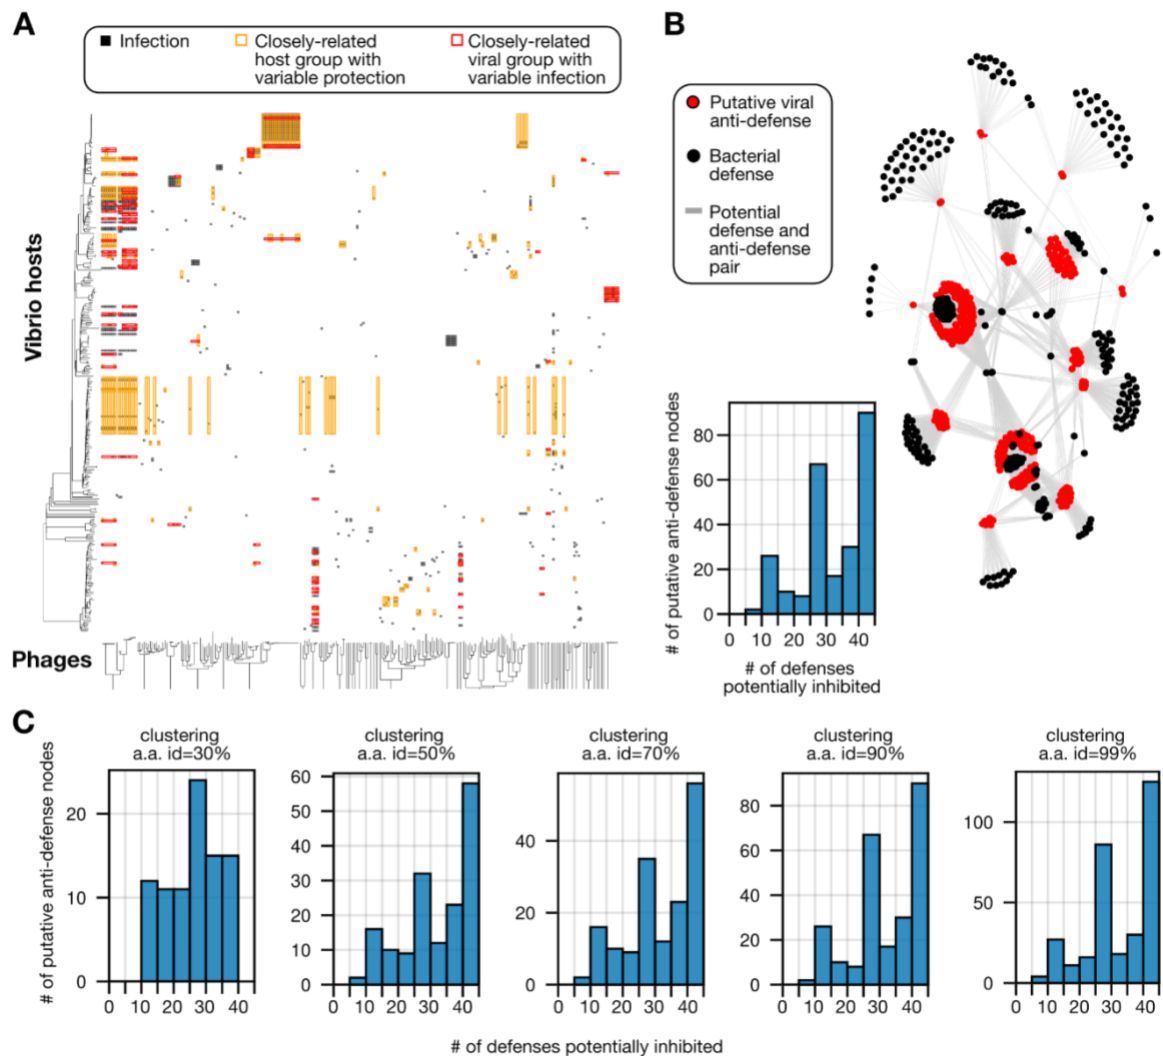

**Extended Data Figure 1. Associating bacterial defenses to putative viral anti-defense genes**  
**is limited by the high number of defenses co-occurring in bacterial genomes.** **a**, The Nahant cross-infection matrix with relevant closely related viral (phage, x-axis) and bacterial groups (y-axis) highlighted. The trees represent FastME dendrograms built from ANI distances. Entries in the matrix are marked with a black box if a particular phage can infect and lyse a particular bacterial host. Groups of closely related phages (average ANI  $\geq 0.95$ ) that differentially infect a

10 particular bacterial host are marked on the matrix with a red rectangle surrounding the relevant  
11 infection data of the phage group and the host. Closely related bacteria (Average ANI  $\geq 0.95$ )  
12 that are differentially protected from a single phage are marked in the same way using golden  
13 rectangles. Putative anti-defenses are identified within each phage group, potential inhibitory  
14 interactions are identified across all genomes (methods). **b**, Network showing connections  
15 between bacterial defenses and the putative viral anti-defenses that inhibit them based on a  
16 comparative genomic analysis of the Nahant cross-infection matrix. Putative anti-defense genes  
17 (red nodes) in viral genomes were identified as gene families (clustered at 90% identity) found  
18 only in viruses infecting a single bacterial host, compared to their close relatives that do not  
19 infect that host (methods). Bacterial defenses (black nodes) in each host were identified using  
20 DefenseFinder, and links are drawn between putative anti-defenses and the defenses encoded in  
21 the infected host. The histogram shows the degree distribution of each anti-defense, i.e., how  
22 many defenses it putatively inhibits. Identifying specific inhibition of defenses by anti-defenses  
23 would require extensive trial and error genetics approaches. **c**, putative anti-defense node degree  
24 histograms for different protein clustering amino-acid (a.a) similarity thresholds (indicated at the  
25 top of each histogram). The distributions are very skewed towards high values for all thresholds,  
26 and there are no clear-cut cases of defense and anti-defense pairs in any threshold.

**Extended Data Figure 2. Mapping of putative anti defenses identified by VirMAD onto viral genomes of the Nahant cross-infection matrix.**

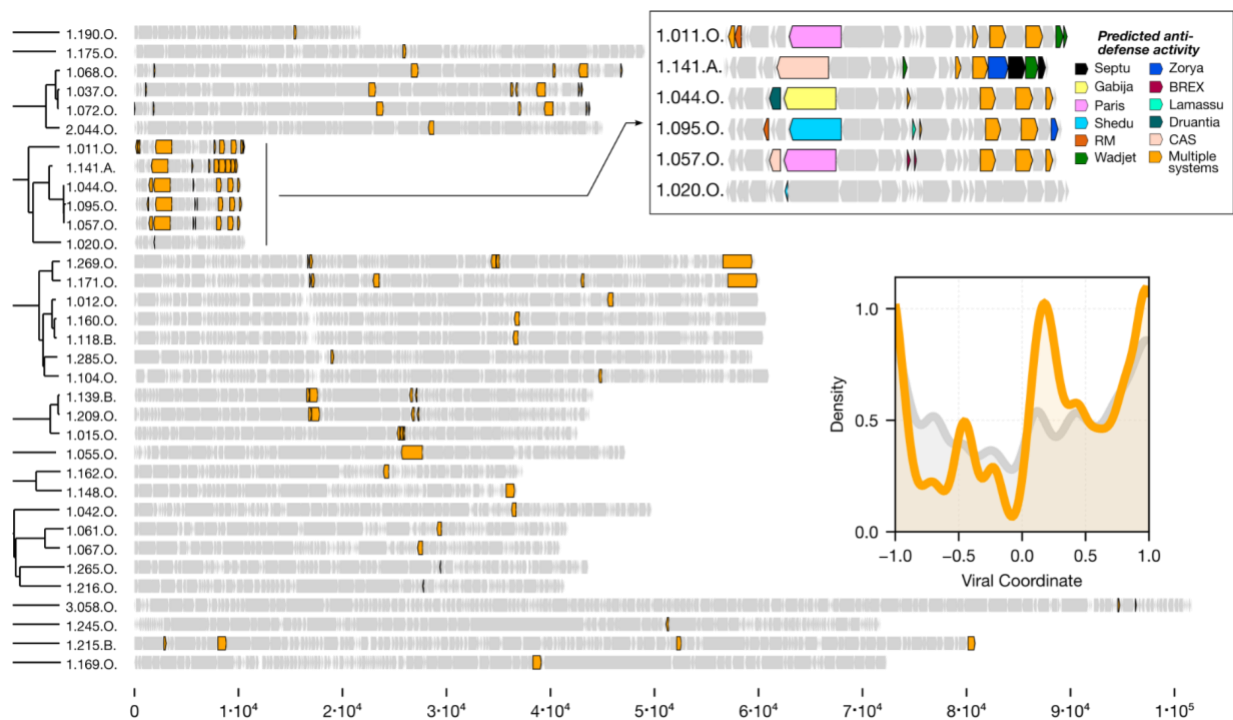

**Extended Data Figure 2. Mapping of putative anti defenses identified by VirMAD onto**

**viral genomes of the Nahant cross-infection matrix.** The tree on the left was built using fastME<sup>68</sup> based on ANI values between full viral genomes. Clades that are disconnected have no detectable homology to viruses from other clades. Only viruses that contained homologues (>90% a.a similarity) of putative anti-defenses are shown. Each row represents a viral genome, starting at the viral terminase small subunit with arrows representing genes to scale as marked in the bottom. The highlighted viruses have short genomes, which contain many putative anti-defenses with different specificities. The density plot on the right shows the normalized position of putative anti-defenses (orange curve) in the viral genomes compared to all genes (gray curve).

**Extended Data Figure 3. Deletion of phage defense systems in the superhost results in increased phage sensitivity**

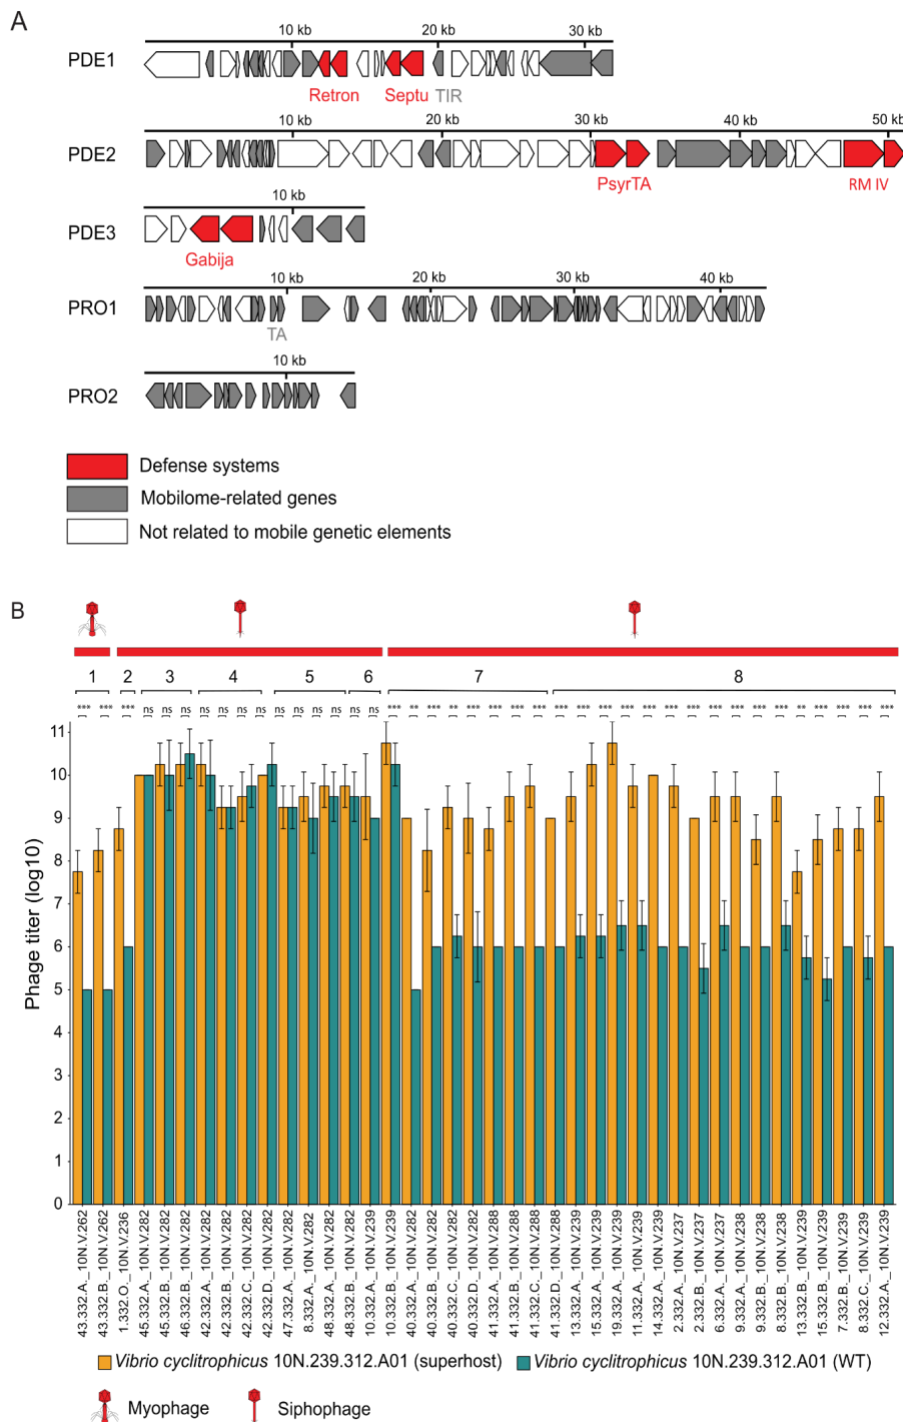

**Extended Data Figure 3. Deletion of phage defense systems in the superhost results in increased phage sensitivity** **a**, Creation of the superhost strain by deletion of mobile genetic elements from *Vibrio cyclitrophicus* 10N.239.312.A01, chosen because they either contained predicted defenses or represented prophages. Arrow gene diagrams drawn to scale (annotations are in Supplementary Table 10). **b**, Comparison of titers of 40 viruses on wild type (teal) and superhost (orange) showing increased susceptibility of the superhost. Numbers under red bars represent clusters of viruses based on genome similarity (Supplementary Table 16). Data represent average of three independent replicates with standard deviations (s.d.) shown as vertical error bars.

**Extended Data Figure 4. Fold-protection conferred by all experimentally verified defense systems**

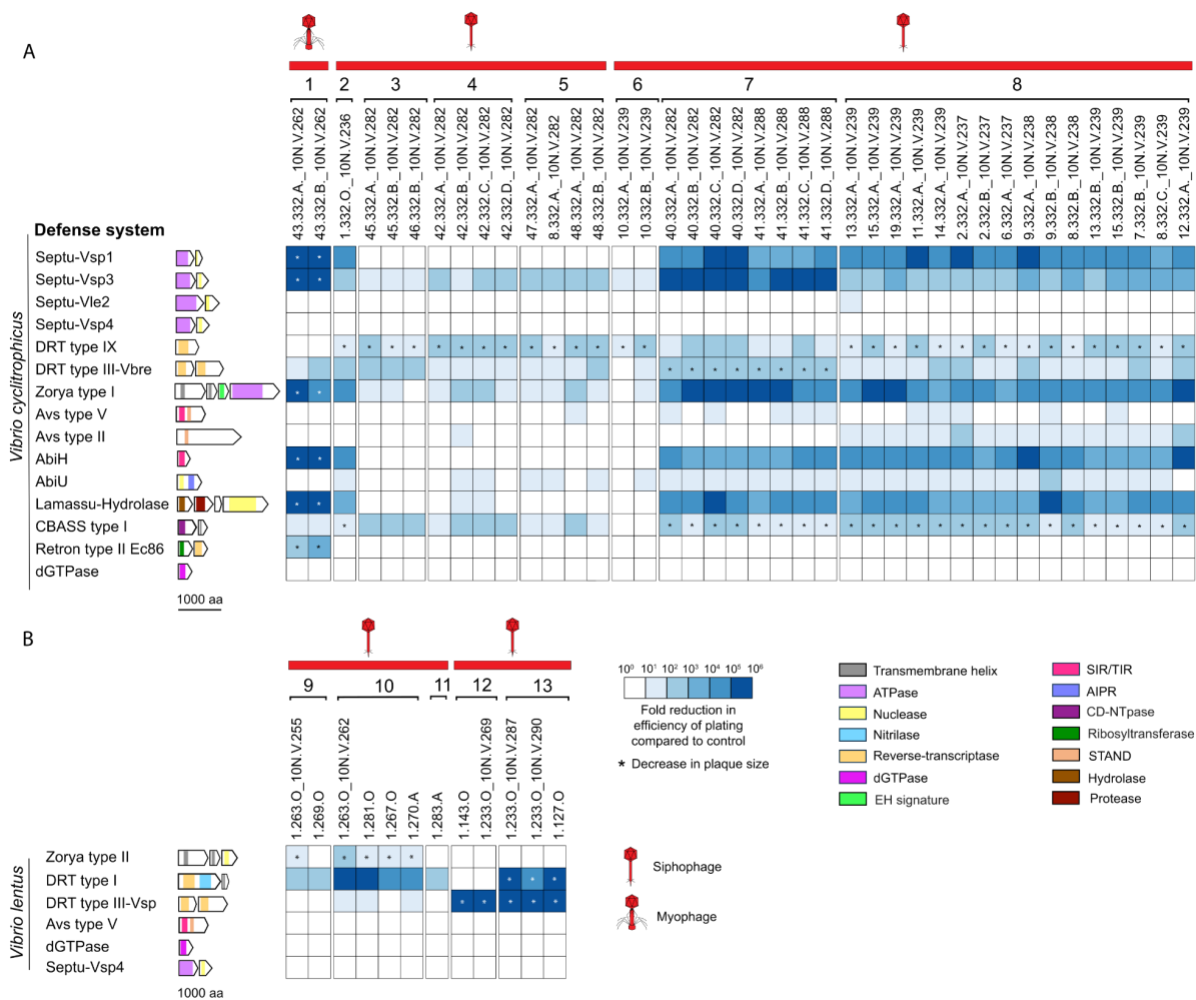

**Extended Data Figure 4. Fold-protection conferred by all experimentally verified defense systems**

Defenses expressed in **a**, the *Vibrio cyclitrophicus* superhost and **b**, *Vibrio lentus*  $\Delta 3$  (methods). The strength of protection is shown as a heatmap where values correspond to the fold change in efficiency of plating (measured in serial dilution plaque assays) compared to an unprotected host (GFP expressing plasmid) for each virus. Numbers above virus identifiers represent clusters of viruses based on genome similarity (Supplementary Table 16). Data

62 represent the average of three replicates (examples of raw data shown in Supplementary Fig. 1).  
63 Asterisks (\*) indicate significant reduction in plaque size. Arrow gene diagrams with predicted  
64 protein domains in color are drawn to scale.

65 **Extended Data Figure 5. Drop spots of 10-fold serially diluted viruses on hosts expressing**  
 66 **GFP (control), defense systems or paired defense systems and anti-defense proteins.**

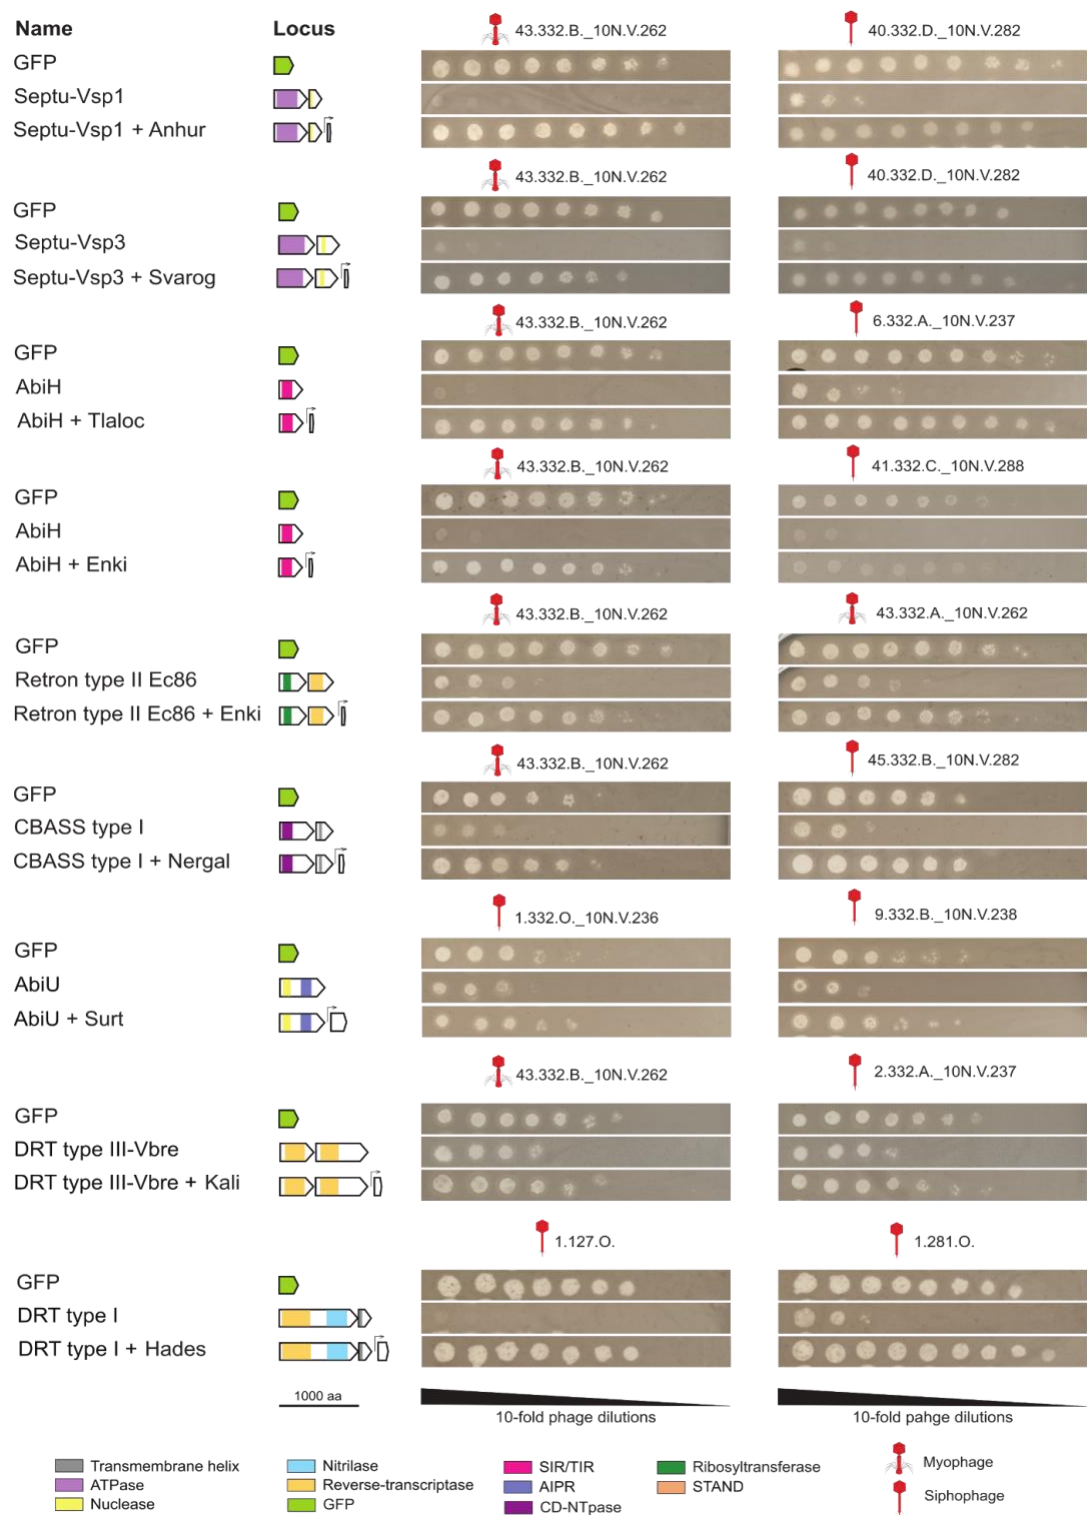



68 **Extended Data Figure 5. Drop spots of 10-fold serially diluted viruses on hosts expressing**  
69 **GFP (control), defense systems or paired defense systems and anti-defense proteins.**

70 This figure accompanies Fig. 2 and Extended Fig. 4. For each paired defense and anti-defense,  
71 the two viruses are shown for which the defense system provided the strongest protection. Plaque  
72 assays are representative of three independent replicates. Arrow gene diagrams with predicted  
73 protein domains in color are drawn to scale.

**Extended Data Figure 6. Anti-defense proteins with multiple non-homologous targets, and defense systems with multiple non-homologous inhibitors.**

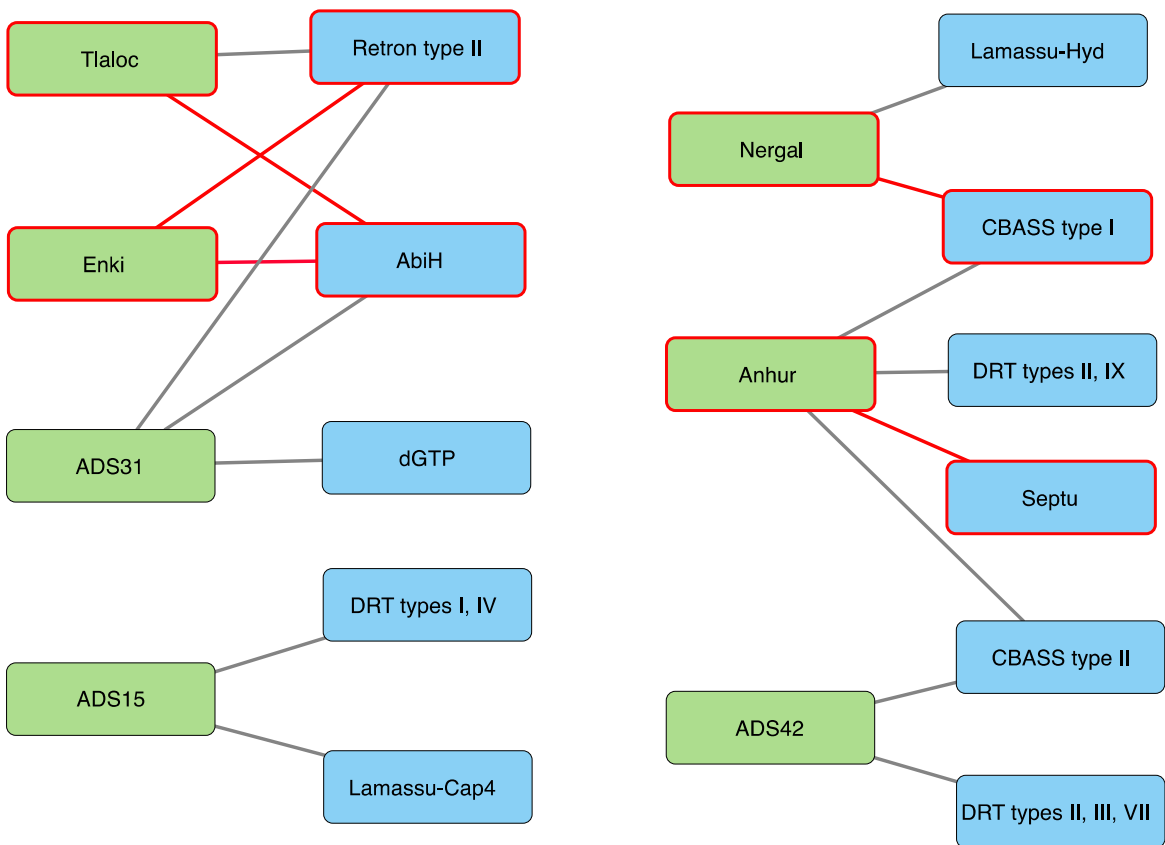

**Extended Data Fig. 6. Anti-defense proteins with multiple non-homologous targets, and defense systems with multiple non-homologous inhibitors.** The network shows highly scored (>80) VirMAD predictions of defense-anti-defense pairs for ten defense systems chosen for experimental verifications. Only anti-defense proteins with two or more predicted types of defense systems are shown in the network. Putative anti-defense proteins (green boxes) are clustered at 95% sequence similarity, while defense systems (blue boxes) were classified into subtypes using DefenseFinder (see Supplementary Tables 1 and 4). Red lines correspond to defense-anti-defense pairs which were experientially verified.

86 **Supplementary Figure 1. Raw data for fold-protection calculation.**

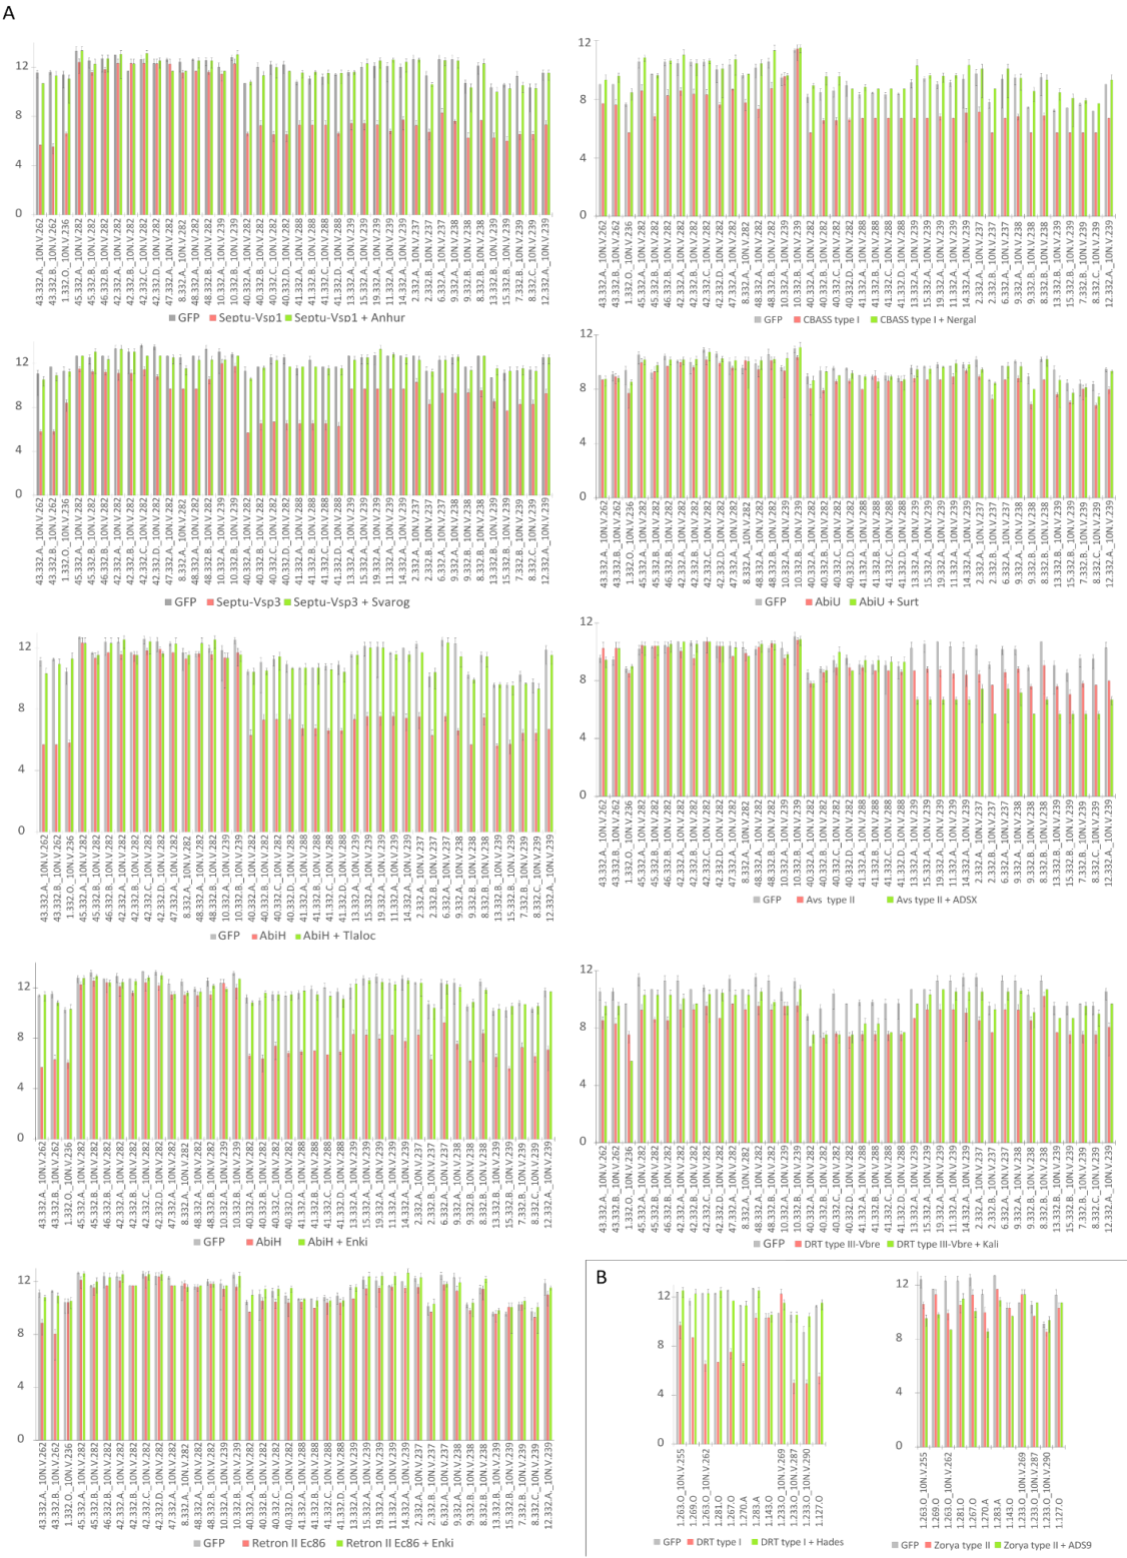

88 **Supplementary Fig. 1. Raw data for fold-protection calculation.** This figure accompanies  
89 Fig. 2 and Extended Fig. 4. Defense systems expressed in **a**, *Vibrio cyclitrophicus* superhost and  
90 **b**, *V. lentus*  $\Delta 3$  (see Methods). Fold-protection data for all verified pairs of defense systems and  
91 anti-defense proteins were obtained for 40 viruses for the superhost strain and 12 viruses for the  
92  $\Delta 3$  strain. Plaque-forming units were measured for each virus on hosts containing either a GFP-  
93 expressing control plasmid (grey), a defense-expressing plasmid (red), or a plasmid expressing  
94 both the defense system and anti-defense protein (green). Data represent an average of three  
95 independent replicates with standard deviations (s.d.) shown as a vertical bars. All defense  
96 systems were expressed from their native promoters, while anti-defense genes were under the  
97 control of an inducible *PlacI* promoter. Virus titers were measured after 24 hours of incubation at  
98 25°C.

**Supplementary Figure 2. Genomic diversity of *Vibrio cyclitrophicus* and *V. lentus* viruses used in plaque assays.**

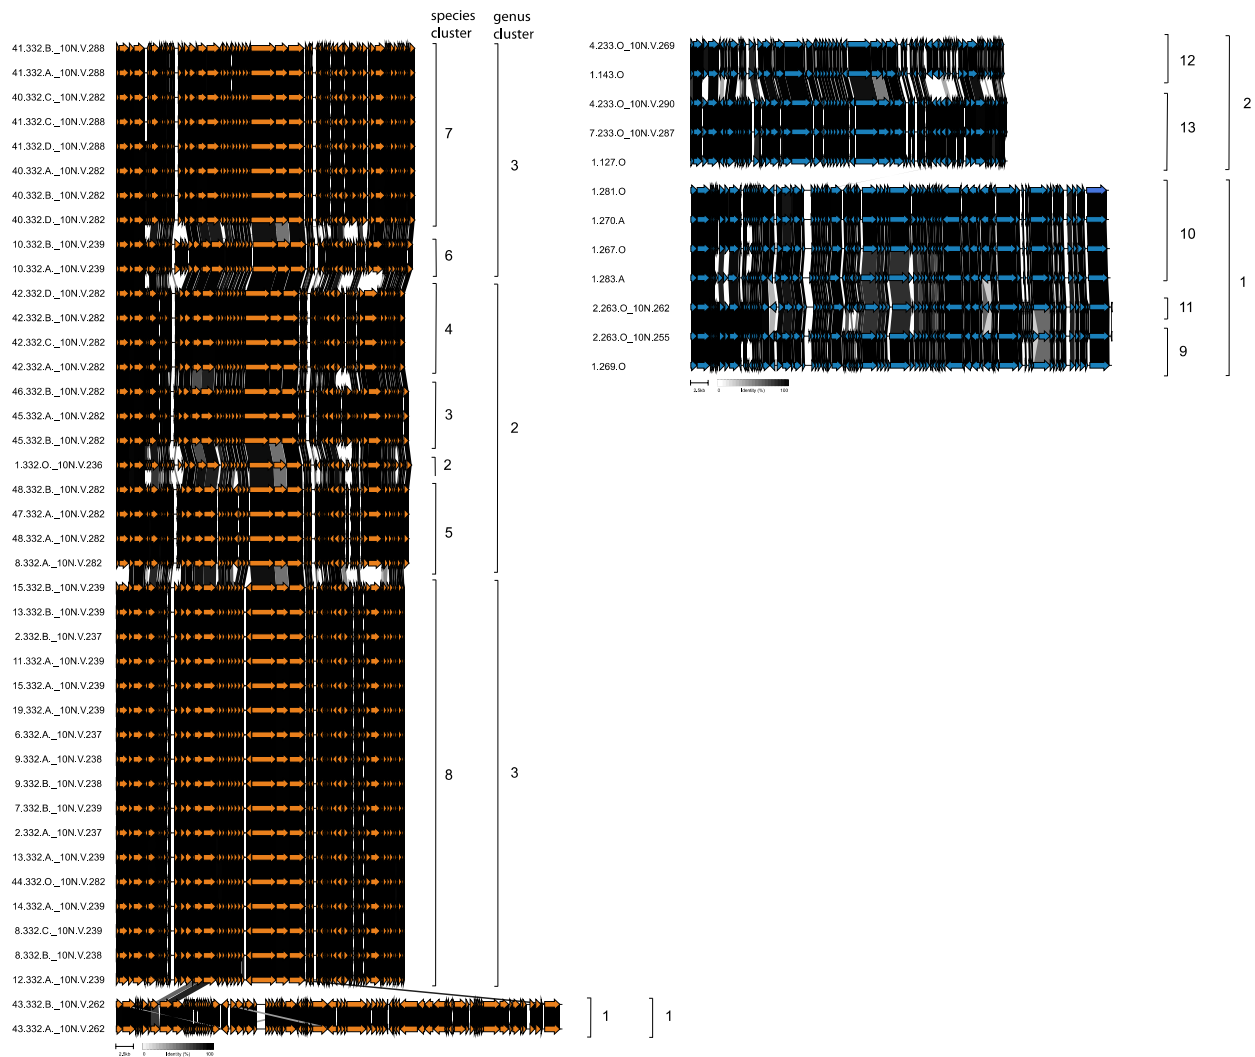

**Supplementary Fig. 2. Genomic diversity of *Vibrio cyclitrophicus* and *V. lentus* viruses used in plaque assays.** Genomic comparison of the 40 viruses infecting *Vibrio cyclitrophicus* superhost (orange) and the 12 viruses infecting *Vibrio lentus*  $\Delta 3$  (blue) used in experiments underlying the data in Fig. 2 and Extended Fig. 4. Grey shading indicates the percent identity between homologous proteins. Species and genus cluster predictions (Viridic) are shown on the right.

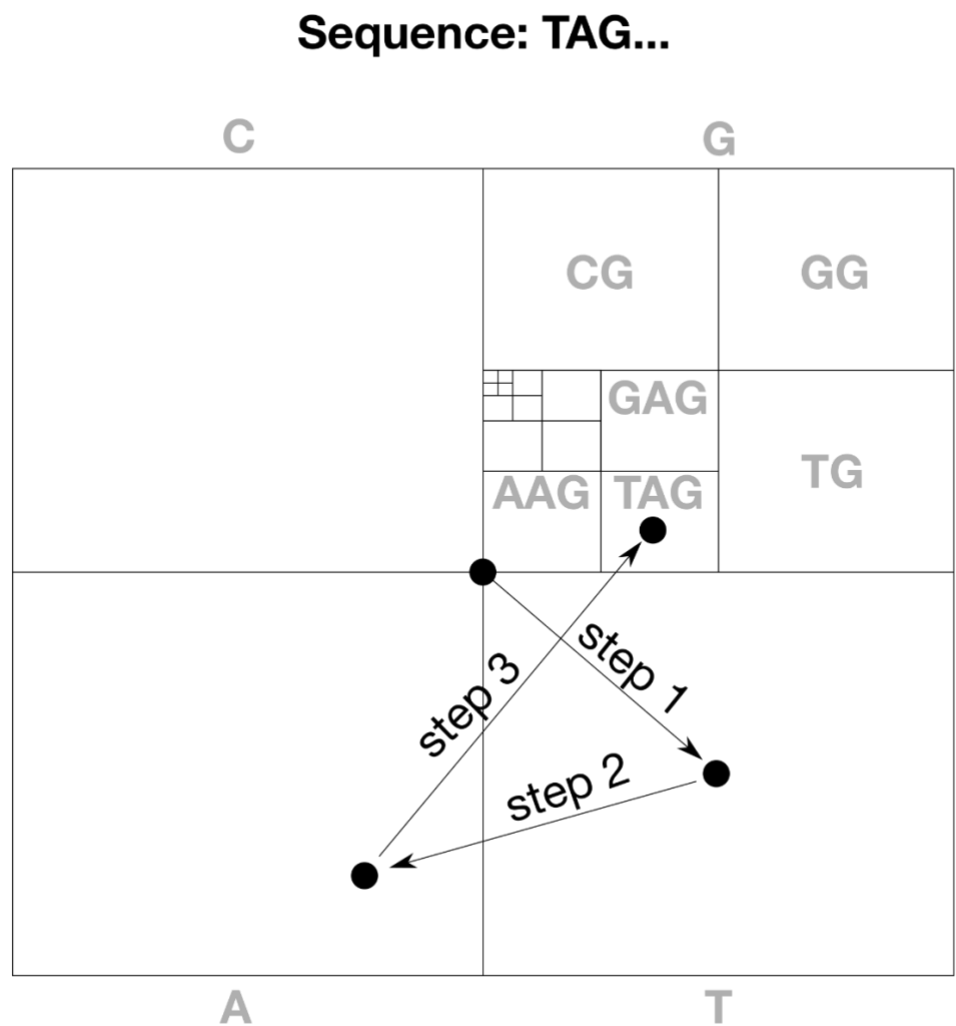

109

110     **Supplementary Fig. 3. Chaos Game Representation of nucleotide sequences.** To visually

111     represent nucleotide sequences, each corner of a square is assigned to a nucleotide. Starting out

112     in the middle of the square, the sequence is processed one base at a time, each time going from

113     the current location halfway to the corner representing the nucleotide being processed. This

114     creates fractal regions corresponding to increasingly long k-mers, as represented in the figure

115     with smaller and smaller squares that divide the total area of the figure. An illustration is

116     provided for the first 3 steps in a sequence that starts with the nucleotides TAG.

**Supplementary Figure 4. Virus-host cross-infection matrix supplementing the Nahant matrix.**

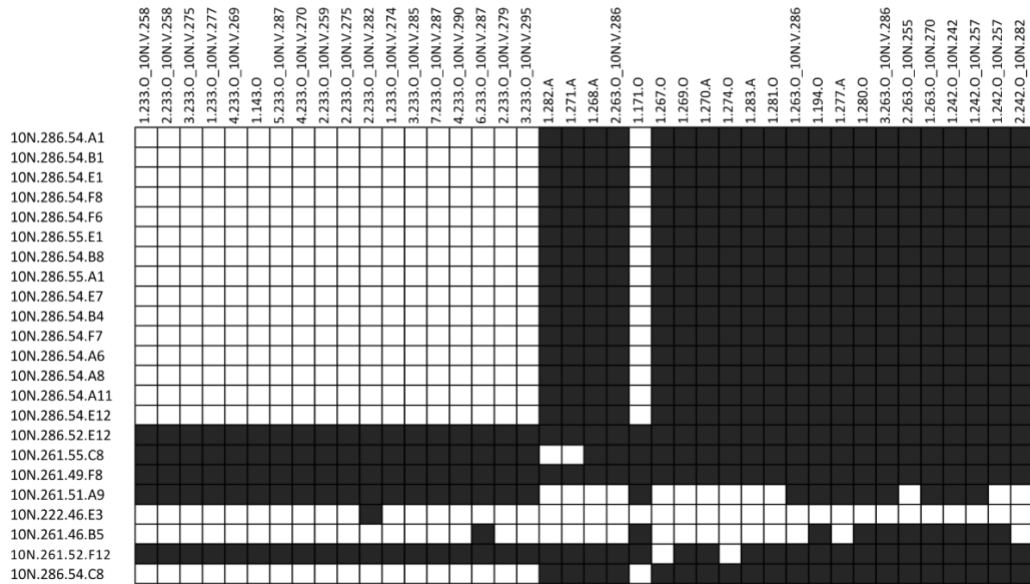

**Supplementary Fig. 4. Virus-host cross-infection matrix supplementing the Nahant matrix.**

Forty viruses were isolated on 5 *Vibrio lentus* strains (methods) and tested against an extended set of 25 *V. lentus* isolates. Positive interactions (lysis) are shown as dark-grey square and negative interactions as white squares. Bacterial strains are ordered based on phylogeny of concatenated single copy ribosomal protein genes; viruses are ordered based on manual sorting of VIRIDIC genus-level trees. This additional matrix was used in the VirMAD predictions.

# Supplementary Tables

**Supplementary Table 1. Nine known anti-defense proteins used as positive controls for model predictions.**

| VirMAD score | Defense system | Defense protein | Defense protein ID | Anti-defense protein | Virus    | Virus protein ID |
|--------------|----------------|-----------------|--------------------|----------------------|----------|------------------|
| 93,6         | DSR2           | DSR2            | API95927.1         | DSAD1                | SPBc2    | AAC13153.1       |
| 99,1         | Gabija         | GajA            | EJQ91274.1         | Gad1                 | phi3T    | APD21271.1       |
|              |                | GajB            | EJQ91275.1         |                      |          |                  |
| 80,0         | Hachiman       | HamA            | KLA13163.1         | Had1                 | SBSphiJ4 | UPI12729.1       |
|              |                | HamB            | KLA13162.1         |                      |          |                  |
| 73,4         | Thoeris        | ThsA            | EJR09240.1         | Tad2                 | SPO1     | YP_002300464.1   |
|              |                | ThsB            | EJR09241.1         |                      |          |                  |
| 70,0         | Thoeris        | ThsA            | EJR09240.1         | Tad1                 | SBSphiJ7 | UPI13470.1       |
|              |                | ThsB            | EJR09241.1         |                      |          |                  |
| 68,4         | Gabija         | GajA            | EJQ91274.1         | Gad2                 | SPbetaL7 | WIT28108.1       |
|              |                | GajB            | EJQ91275.1         |                      |          |                  |
| NA           | CBASS          | Cyclase         | CAP15_YERAE        | Acb1                 | T4       | AAD42501.1       |
|              |                | Cap15           | CDNE_YERAE         |                      |          |                  |
| NA           | Pycsar         | PycA            | WP_001682322.1     | Apyc1                | SBSphiJ  | APYC1_BPSBS      |
|              |                | PycB            | WP_053265929.1     |                      |          |                  |
| NA           | CBASS          | Cap2            | P0DX87.1           | Acb2                 | PaMx33   | ANA48877.1       |
|              |                | CdnA            | P0DX86.1           |                      |          |                  |
|              |                | CapV            | P0DX85.1           |                      |          |                  |

\*NA - confidence of predictions too low



132 **Supplementary Table 2. Relative abundance of defense systems in 758 *Vibrio* genomes from the**  
133 **Nahant collection.**

| Defense system type             | % relative abundance | VirMAD<br>prediction | Experimental verification<br>of defense phenotype |
|---------------------------------|----------------------|----------------------|---------------------------------------------------|
| <b>Restriction-modification</b> | 35,9                 | YES                  |                                                   |
| <b>dGTPase</b>                  | 13,6                 | YES                  | YES                                               |
| <b>Septu</b>                    | 7,1                  | YES                  | YES                                               |
| <b>CRISPR</b>                   | 4,9                  | YES                  |                                                   |
| <b>Gabija</b>                   | 4,3                  | YES                  |                                                   |
| <b>CBASS</b>                    | 3,8                  | YES                  | YES                                               |
| <b>Retron</b>                   | 3,7                  | YES                  | YES                                               |
| <b>Wadjet</b>                   | 2,6                  | YES                  |                                                   |
| <b>DRT</b>                      | 2,4                  | YES                  | YES                                               |
| <b>Dnd</b>                      | 2,0                  | YES                  |                                                   |
| <b>AbiH</b>                     | 1,4                  | YES                  | YES                                               |
| <b>Rst_PARIS</b>                | 1,3                  | YES                  |                                                   |
| <b>Zorya</b>                    | 1,3                  | YES                  | YES                                               |
| <b>Hachiman</b>                 | 1,1                  |                      |                                                   |
| <b>SspBCDE</b>                  | 1,1                  |                      |                                                   |
| <b>Kiwa</b>                     | 1,0                  |                      |                                                   |
| <b>Shedu</b>                    | 0,9                  | YES                  |                                                   |
| <b>Lit</b>                      | 0,8                  |                      |                                                   |
| <b>Druantia</b>                 | 0,8                  | YES                  |                                                   |
| <b>Viperin</b>                  | 0,8                  |                      |                                                   |
| <b>DarTG</b>                    | 0,7                  |                      |                                                   |
| <b>dCTPdeaminase</b>            | 0,7                  |                      |                                                   |
| <b>Avs</b>                      | 0,7                  | YES                  | YES                                               |

|                            |     |     |     |
|----------------------------|-----|-----|-----|
| <b>Gao_Ppl</b>             | 0,6 |     |     |
| <b>BREX</b>                | 0,6 | YES |     |
| <b>AbiU</b>                | 0,5 | YES | YES |
| <b>Thoeris</b>             | 0,5 |     |     |
| <b>Dsr</b>                 | 0,5 |     |     |
| <b>Gao_Hhe</b>             | 0,4 |     |     |
| <b>Rst_3HP</b>             | 0,4 |     |     |
| <b>Lamassu</b>             | 0,4 | YES | YES |
| <b>Gao_Qat</b>             | 0,4 |     |     |
| <b>PrrC</b>                | 0,3 |     |     |
| <b>AbiEii</b>              | 0,3 |     |     |
| <b>Gao_Her</b>             | 0,3 |     |     |
| <b>Gao_Ape</b>             | 0,3 |     |     |
| <b>Gao_Tmn</b>             | 0,3 |     |     |
| <b>RADAR</b>               | 0,3 |     |     |
| <b>Rst_DprA-PPRT</b>       | 0,2 |     |     |
| <b>Rst_HelicaseDUF2290</b> | 0,2 |     |     |
| <b>Rst_DUF4238</b>         | 0,2 |     |     |
| <b>BstA</b>                | 0,1 |     |     |
| <b>DISARM</b>              | 0,1 |     |     |
| <b>Gao_Iet</b>             | 0,1 |     |     |
| <b>Gao_RL</b>              | 0,1 |     |     |
| <b>Nhi</b>                 | 0,1 |     |     |
| <b>Rst_TIR-NLR</b>         | 0,1 |     |     |
| <b>Gao_Mza</b>             | 0,1 |     |     |
| <b>Gao_Upx</b>             | 0,1 |     |     |
| <b>Rst_Hydrolase-3Tm</b>   | 0,1 |     |     |

135 **Supplementary Table 3. Number of putative anti-defense proteins predicted by the VirMAD model**  
136 **for 19 defense system types**

| Defense system name | Number of putative anti-defense proteins 137 |           |
|---------------------|----------------------------------------------|-----------|
|                     | score >50                                    | score >80 |
| <b>AbiH</b>         | 8                                            | 3         |
| <b>AbiU</b>         | 2                                            | 0         |
| <b>Avs</b>          | 10                                           | 1         |
| <b>Brex</b>         | 11                                           | 1         |
| <b>CBASS</b>        | 34                                           | 4         |
| <b>CRISPR</b>       | 54                                           | 45        |
| <b>dGTP</b>         | 12                                           | 1         |
| <b>DND</b>          | 13                                           | 1         |
| <b>DRT</b>          | 37                                           | 10        |
| <b>Druantia</b>     | 3                                            | 2         |
| <b>Gabija</b>       | 20                                           | 13        |
| <b>Lamassu</b>      | 5                                            | 2         |
| <b>Paris</b>        | 11                                           | 6         |
| <b>Retron</b>       | 26                                           | 4         |
| <b>RM</b>           | 71                                           | 6         |
| <b>Septu</b>        | 53                                           | 7         |
| <b>Shedu</b>        | 7                                            | 3         |
| <b>Wadjet</b>       | 22                                           | 4         |
| <b>Zorya</b>        | 17                                           | 5         |

139 **Supplementary Table 4. Cloned defense systems and putative anti-defense proteins.**

| Defense type | Abundance rank <sup>1</sup> | Subtype        | Vibrio strain <sup>2</sup>                      | Defense <sup>3</sup> |           | Anti-defense <sup>3</sup> |        |           |                   |
|--------------|-----------------------------|----------------|-------------------------------------------------|----------------------|-----------|---------------------------|--------|-----------|-------------------|
|              |                             |                |                                                 | Cloned               | Phenotype | Score                     | Cloned | Phenotype | Name <sup>4</sup> |
| Septu        | 3                           | Vsp1*          | <i>Vibrio</i> sp. F13<br>10N.222.55.C6          | Y                    | Y         | 86.8                      | Y      | Y         | Anhur             |
|              |                             | Vle2*          | <i>V. lentus</i><br>10N.286.52.E8               | Y                    | N         | 88.8                      |        |           |                   |
|              |                             | Vsp3*          | <i>V. splendidus</i><br>10N.261.46.F            | Y                    | Y         | 81.3                      | Y      | Y         | Svarog            |
|              |                             | Vsp4*          | <i>Vibrio</i> sp. F13<br>10N.222.54.A6          | Y                    | N         | 100.0                     |        |           |                   |
| DRT          | 9                           | Type I         | <i>V. lentus</i><br>10N.261.45.F4               | Y                    | Y         | 85.7                      | Y      | Y         | Hades             |
|              |                             | Type III-Vsp*  | <i>V. sp</i><br>10N.286.54.E3                   | Y                    | Y         | 96.6                      | N      |           |                   |
|              |                             | Type IX        | <i>Vibrio</i> sp.<br>10N.222.51.F6              |                      |           |                           |        |           |                   |
|              |                             | Type III-Vbre* | <i>V. breoganii</i><br>10N.261.51.E6            | Y                    | Y         | 57.7                      | Y      | Y         | Kali              |
| AbiH         | 11                          |                | <i>Vibrio</i> sp.<br>10N.286.45.F3              | Y                    | Y         | 94.8                      | Y      | Y         | Enki              |
|              |                             |                | <i>Vibrio</i> sp.<br>10N.286.45.F3              | Y                    | Y         | 93.0                      | Y      | Y         | Tlaloc            |
| Avast        | 23                          | Type V         | <i>V. breoganii</i><br>10N.261.54.C7            | Y                    | Y         | 100.0                     | N      |           |                   |
|              |                             | Type II        | <i>Vibrio</i> sp. 62478                         | Y                    | Y         | 52.8                      | Y      | N         |                   |
| CBASS        | 6                           | Type I         | <i>V. lentus</i><br>10N.286.45.C1               | Y                    | Y         | 85.2                      | Y      | Y         | Nergal            |
| Retron       | 7                           | Type II        | <i>Vibrio</i> sp. F13<br>Ec86<br>10N.222.55.A11 | Y                    | Y         | 91.9                      | Y      | Y         | Enki              |
|              |                             |                | <i>Vibrio</i> sp. F13<br>10N.222.55.A11         | Y                    | Y         | 99.6                      | N      |           |                   |
| Zorya        | 13                          | Type I         | <i>Vibrio</i> sp. F13<br>10N.222.55.A11         | Y                    | Y         |                           |        |           |                   |

|                         |    |           |                        |   |   |       |   |   |      |
|-------------------------|----|-----------|------------------------|---|---|-------|---|---|------|
| <b>AbiU</b>             | 26 |           | <i>V. lentus</i>       | Y | Y | 56.8  | Y | Y | Surt |
|                         |    |           | 10N.261.52.F1          |   |   |       |   |   |      |
| <b>Lamassu</b>          | 32 | Hydrolase | <i>Vibrio</i> sp.      | Y | Y | 100.0 | N |   |      |
|                         |    | Protease  | 10N.222.49.C10         |   |   |       |   |   |      |
| <b>dGTPase</b>          | 2  |           | <i>V. tasmaniensis</i> | Y | N | 62.1  |   |   |      |
|                         |    |           | 10N.261.46.A9          |   |   |       |   |   |      |
| <b>Negative control</b> |    |           |                        |   |   |       |   |   |      |
| <b>Zorya</b>            | 13 | Type II   | <i>V. sp</i>           | Y | Y | -     | Y |   |      |
|                         |    |           | 10N.286.46.A10         |   |   |       |   |   |      |

140

141 <sup>1</sup> The abundance of each defense system was determined as a percent composition of a defense system  
142 relative to the total number of defense systems in 758 *Vibrio* genomes, see Supplementary Table 2 for the  
143 list of defense systems and their percent of abundance.

144 <sup>2</sup> Accession numbers for all genomes are in Supplementary Data 2.

145 <sup>3</sup> Y = successful cloning or verified defense phenotype; N = failed cloning or absence of defense  
146 phenotype. No entry = not attempted.

147 <sup>4</sup> Unique anti-defense proteins were named according to the scheme in Supplementary Table 6.

148 \* In cases where multiple operons were cloned for the same type or subtype of defense system, the  
149 subtype name was supplemented with an additional descriptor, e.g., Vsp1 – abbreviation for *Vibrio sp* 1  
150 according to the systematic nomenclature for Retrons described elsewhere<sup>1</sup>.

151

**Supplementary Table 5. Experimentally verified anti-defense proteins active against a wide range of defense systems.**

| <b>Anti-defense protein</b> | <b>Anti-defense cluster number<sup>1</sup></b> | <b>Active against defence system</b> | <b>Derived from phage, ID</b> | <b>Length, aa</b> | <b>Model score</b> |
|-----------------------------|------------------------------------------------|--------------------------------------|-------------------------------|-------------------|--------------------|
| <b>Anhur</b>                | ADS36                                          | Septu                                | 1.196.O.                      | 37                | 86,8               |
| <b>Svarog</b>               | ADS43                                          | Septu                                | 1.066.O.                      | 42                | 81,3               |
| <b>Enki</b>                 | ADS29                                          | AbiH, Retron type II                 | 1.080.O.                      | 38                | 93,0/91,9          |
| <b>Tlaloc</b>               | ADS30                                          | AbiH                                 | 1.056.O.                      | 41                | 94,8               |
| <b>Nergal</b>               | ADS45                                          | CBASS type I                         | 1.209.O.                      | 55                | 82,2               |
| <b>Surt</b>                 | ADS32                                          | AbiU                                 | 1.217.O.                      | 195               | 56,8               |
| <b>Kali</b>                 | ADS4                                           | DRT typeIII                          | 1.139.B.                      | 89                | 57,5               |
| <b>Hades</b>                | ADS46                                          | DRT type I                           | 1.066.O.                      | 125               | 85,7               |

<sup>1</sup> see Supplementary Data 2.

156 **Supplementary Table 6. Examples of possible names for anti-defenses in the proposed naming**  
157 **scheme based on gods or mythological figures to whom some form of destruction is ascribed.**

| God <sup>1</sup> | Ascribed role in religion or mythology <sup>2</sup>                                                                                          |
|------------------|----------------------------------------------------------------------------------------------------------------------------------------------|
| <b>Shiva</b>     | In Hindu mythology, Shiva is often depicted as the destroyer of the universe, responsible for bringing about the end of cycles of creation.  |
| <b>Sekhmet</b>   | In Egyptian mythology, Sekhmet is a lioness-headed goddess associated with war, destruction, and healing.                                    |
| <b>Hades</b>     | In Greek mythology, Hades is the god of the underworld, associated with death and the afterlife.                                             |
| <b>Kali</b>      | In Hindu mythology, Kali is a fierce goddess associated with destruction, time, and change.                                                  |
| <b>Thor</b>      | In Norse mythology, Thor is the god of thunder associated with storms, lightning, and destruction.                                           |
| <b>Anhur</b>     | In Egyptian mythology, Anhur is a warrior god associated with war and destruction.                                                           |
| <b>Enki</b>      | In Sumerian mythology, Enki is a god associated with water, wisdom, and also with the power to bring about floods and destruction.           |
| <b>Tlaloc</b>    | In Aztec mythology, Tlaloc is the god of rain, storms, and water, sometimes associated with destructive floods.                              |
| <b>Ares</b>      | In Greek mythology, Ares is the god of war, violence, and bloodshed, often associated with destruction on the battlefield.                   |
| <b>Mars</b>      | In Roman mythology, Mars is the counterpart of Ares, also representing war and destruction.                                                  |
| <b>Set</b>       | In Egyptian mythology, Set is a god associated with chaos, storms, and destruction. He is often depicted as a malevolent force.              |
| <b>Surt</b>      | In Norse mythology, Surt is a fire giant who plays a significant role in the destruction of the world during Ragnarok, the end of the world. |
| <b>Eris</b>      | In Greek mythology, Eris is the goddess of strife, discord, and chaos, often causing destruction through her actions.                        |

|                     |                                                                                                                                                                    |
|---------------------|--------------------------------------------------------------------------------------------------------------------------------------------------------------------|
| <i>Nergal</i>       | In Mesopotamian mythology, Nergal is the god of war and plague, associated with destruction and death.                                                             |
| <i>Svarog</i>       | In Slavic mythology, Svarog is a deity associated with fire, blacksmithing, and sometimes destruction.                                                             |
| <b>Tezcatlipoca</b> | In Aztec mythology, Tezcatlipoca is a god associated with night, sorcery, and destruction, often depicted with a smoking mirror representing destruction and fate. |
| <b>Kraken</b>       | A legendary sea monster known for its strength and ability to defeat sailors.                                                                                      |
| <b>Perseus</b>      | A hero in Greek mythology who defeated the Gorgon Medusa with clever tactics.                                                                                      |
| <b>Fenrir</b>       | A monstrous wolf in Norse mythology known for breaking free of chains and causing chaos.                                                                           |
| <b>Cu Chulainn</b>  | A hero in Irish mythology known for his exceptional skill in battle.                                                                                               |
| <b>Tiamat</b>       | A primordial goddess in Babylonian mythology associated with chaos and overcoming order.                                                                           |
| <b>Karna</b>        | A warrior in Hindu mythology known for his skill and resilience in battle.                                                                                         |
| <b>Echidna</b>      | A creature in Greek mythology known as the "Mother of Monsters," overcoming various foes.                                                                          |

158

159 <sup>1</sup> Names used for systems verified here are italicized.

160 <sup>2</sup> The description was obtained from ChatGTP (March 2024)

161



162 **Supplementary table 7. Classification of *V.cyclitrophicus* and *V.lentus* phages used in the plaque**  
163 **assays.**

| Official virus name     | Short virus name  | Family      | Genus         | Species       | Day of isolation | Genome length, bp | Accession number |
|-------------------------|-------------------|-------------|---------------|---------------|------------------|-------------------|------------------|
| 1.332.O._10N.239.312.A0 | 1.332.O._10N.V.23 | Nibaviridae | Fabiennevirus | Fabiennevirus | 236              | 41880             | PRJNA32810       |
| 1.SH1_10N.V.236         | 6                 |             |               | fabienneuna   |                  |                   | 2                |
| 10.332.A._10N.239.312.A | 10.332.A._10N.V.2 | Nibaviridae | Ninavirus     | Ninavirus     | 239              | 41998             | PRJNA32810       |
| 01.SH1_10N.V.239        | 39                |             |               | ninauna       |                  |                   | 2                |
| 10.332.B._10N.239.312.A | 10.332.B._10N.V.2 | Nibaviridae | Ninavirus     | Ninavirus     | 239              | 41998             | PRJNA32810       |
| 01.SH1_10N.V.239        | 39                |             |               | ninauna       |                  |                   | 2                |
| 11.332.A._10N.239.312.A | 11.332.A._10N.V.2 | Nibaviridae | Ninavirus     | Ninavirus     | 239              | 40889             | PRJNA32810       |
| 01.SH1_10N.V.239        | 39                |             |               | ninaduae      |                  |                   | 2                |
| 12.332.A._10N.239.312.A | 12.332.A._10N.V.2 | Nibaviridae | Ninavirus     | Ninavirus     | 239              | 40889             | PRJNA32810       |
| 01.SH1_10N.V.239        | 39                |             |               | ninaduae      |                  |                   | 2                |
| 13.332.A._10N.239.312.A | 13.332.A._10N.V.2 | Nibaviridae | Ninavirus     | Ninavirus     | 239              | 40889             | PRJNA32810       |
| 01.SH1_10N.V.239        | 39                |             |               | ninaduae      |                  |                   | 2                |
| 13.332.B._10N.239.312.A | 13.332.B._10N.V.2 | Nibaviridae | Ninavirus     | Ninavirus     | 239              | 40889             | PRJNA32810       |
| 01.SH1_10N.V.239        | 39                |             |               | ninaduae      |                  |                   | 2                |
| 14.332.A._10N.239.312.A | 14.332.A._10N.V.2 | Nibaviridae | Ninavirus     | Ninavirus     | 239              | 40889             | PRJNA32810       |
| 01.SH1_10N.V.239        | 39                |             |               | ninaduae      |                  |                   | 2                |
| 15.332.A._10N.239.312.A | 15.332.A._10N.V.2 | Nibaviridae | Ninavirus     | Ninavirus     | 239              | 40889             | PRJNA32810       |
| 01.SH1_10N.V.239        | 39                |             |               | ninaduae      |                  |                   | 2                |
| 15.332.B._10N.239.312.A | 15.332.B._10N.V.2 | Nibaviridae | Ninavirus     | Ninavirus     | 239              | 40889             | PRJNA32810       |
| 01.SH1_10N.V.239        | 39                |             |               | ninaduae      |                  |                   | 2                |
| 19.332.A._10N.239.312.A | 19.332.A._10N.V.2 | Nibaviridae | Ninavirus     | Ninavirus     | 239              | 40889             | PRJNA32810       |
| 01.SH1_10N.V.239        | 39                |             |               | ninaduae      |                  |                   | 2                |
| 2.332.A._10N.239.312.A0 | 2.332.A._10N.V.23 | Nibaviridae | Ninavirus     | Ninavirus     | 237              | 40889             | PRJNA32810       |
| 1.SH1_10N.V.237         | 7                 |             |               | ninaduae      |                  |                   | 2                |
| 2.332.B._10N.239.312.A0 | 2.332.B._10N.V.23 | Nibaviridae | Ninavirus     | Ninavirus     | 237              | 40889             | PRJNA32810       |
| 1.SH1_10N.V.237         | 7                 |             |               | ninaduae      |                  |                   | 2                |
| 40.332.A._10N.239.312.A | 40.332.A._10N.V.2 | Nibaviridae | Ninavirus     | Ninavirus     | 282              | 42318             | PRJNA32810       |
| 01.SH1_10N.V.282        | 82                |             |               | ninatria      |                  |                   | 2                |
| 40.332.B._10N.239.312.A | 40.332.B._10N.V.2 | Nibaviridae | Ninavirus     | Ninavirus     | 282              | 42318             | PRJNA32810       |
| 01.SH1_10N.V.282        | 82                |             |               | ninatria      |                  |                   | 2                |

|                         |                   |                    |                      |                       |     |       |            |
|-------------------------|-------------------|--------------------|----------------------|-----------------------|-----|-------|------------|
| 40.332.C._10N.239.312.A | 40.332.C._10N.V.2 | <i>Nibaviridae</i> | <i>Ninavirus</i>     | <i>Ninavirus</i>      | 282 | 42318 | PRJNA32810 |
| 01.SH1_10N.V.282        | 82                |                    |                      | <i>ninatria</i>       |     |       | 2          |
| 40.332.D._10N.239.312.A | 40.332.D._10N.V.2 | <i>Nibaviridae</i> | <i>Ninavirus</i>     | <i>Ninavirus</i>      | 282 | 42318 | PRJNA32810 |
| 01.SH1_10N.V.282        | 82                |                    |                      | <i>ninatria</i>       |     |       | 2          |
| 41.332.A._10N.239.312.A | 41.332.A._10N.V.2 | <i>Nibaviridae</i> | <i>Ninavirus</i>     | <i>Ninavirus</i>      | 288 | 42316 | PRJNA32810 |
| 01.SH1_10N.V.288        | 88                |                    |                      | <i>ninatria</i>       |     |       | 2          |
| 41.332.B._10N.239.312.A | 41.332.B._10N.V.2 | <i>Nibaviridae</i> | <i>Ninavirus</i>     | <i>Ninavirus</i>      | 288 | 42317 | PRJNA32810 |
| 01.SH1_10N.V.288        | 88                |                    |                      | <i>ninatria</i>       |     |       | 2          |
| 41.332.C._10N.239.312.A | 41.332.C._10N.V.2 | <i>Nibaviridae</i> | <i>Ninavirus</i>     | <i>Ninavirus</i>      | 288 | 42318 | PRJNA32810 |
| 01.SH1_10N.V.288        | 88                |                    |                      | <i>ninatria</i>       |     |       | 2          |
| 41.332.D._10N.239.312.A | 41.332.D._10N.V.2 | <i>Nibaviridae</i> | <i>Ninavirus</i>     | <i>Ninavirus</i>      | 288 | 42318 | PRJNA32810 |
| 01.SH1_10N.V.288        | 88                |                    |                      | <i>ninatria</i>       |     |       | 2          |
| 42.332.A._10N.239.312.A | 42.332.A._10N.V.2 | <i>Nibaviridae</i> | <i>Fabiennevirus</i> | <i>Fabiennevirus</i>  | 282 | 40897 | PRJNA32810 |
| 01.SH1_10N.V.282        | 82                |                    |                      | <i>fabienne-duae</i>  |     |       | 2          |
| 42.332.B._10N.239.312.A | 42.332.B._10N.V.2 | <i>Nibaviridae</i> | <i>Fabiennevirus</i> | <i>Fabiennevirus</i>  | 282 | 40897 | PRJNA32810 |
| 01.SH1_10N.V.282        | 82                |                    |                      | <i>fabienne-duae</i>  |     |       | 2          |
| 42.332.C._10N.239.312.A | 42.332.C._10N.V.2 | <i>Nibaviridae</i> | <i>Fabiennevirus</i> | <i>Fabiennevirus</i>  | 282 | 40897 | PRJNA32810 |
| 01.SH1_10N.V.282        | 82                |                    |                      | <i>fabienne-duae</i>  |     |       | 2          |
| 42.332.D._10N.239.312.A | 42.332.D._10N.V.2 | <i>Nibaviridae</i> | <i>Fabiennevirus</i> | <i>Fabiennevirus</i>  | 282 | 40897 | PRJNA32810 |
| 01.SH1_10N.V.282        | 82                |                    |                      | <i>fabienne-duae</i>  |     |       | 2          |
| 43.332.A._10N.239.312.A | 43.332.A._10N.V.2 | <i>Fatimavirid</i> | <i>Lisavirus</i>     | <i>Lisavirus</i>      | 262 | 63173 | PRJNA32810 |
| 01.SH1_10N.V.262        | 62                | <i>ae</i>          |                      | <i>lisaduae</i>       |     |       | 2          |
| 43.332.B._10N.239.312.A | 43.332.B._10N.V.2 | <i>Fatimavirid</i> | <i>Lisavirus</i>     | <i>Lisavirus</i>      | 262 | 63173 | PRJNA32810 |
| 01.SH1_10N.V.262        | 62                | <i>ae</i>          |                      | <i>lisaduae</i>       |     |       | 2          |
| 45.332.A._10N.239.312.A | 45.332.A._10N.V.2 | <i>Nibaviridae</i> | <i>Fabiennevirus</i> | <i>Fabiennevirus</i>  | 262 | 41452 | PRJNA32810 |
| 01.SH1_10N.V.282        | 82                |                    |                      | <i>fabiennetria</i>   |     |       | 2          |
| 45.332.B._10N.239.312.A | 45.332.B._10N.V.2 | <i>Nibaviridae</i> | <i>Fabiennevirus</i> | <i>Fabiennevirus</i>  | 282 | 41452 | PRJNA32810 |
| 01.SH1_10N.V.282        | 82                |                    |                      | <i>fabiennetria</i>   |     |       | 2          |
| 46.332.B._10N.239.312.A | 46.332.B._10N.V.2 | <i>Nibaviridae</i> | <i>Fabiennevirus</i> | <i>Fabiennevirus</i>  | 282 | 41452 | PRJNA32810 |
| 01.SH1_10N.V.282        | 82                |                    |                      | <i>fabiennetria</i>   |     |       | 2          |
| 47.332.A._10N.239.312.A | 47.332.A._10N.V.2 | <i>Nibaviridae</i> | <i>Fabiennevirus</i> | <i>Fabiennevirus</i>  | 282 | 41488 | PRJNA32810 |
| 01.SH1_10N.V.282        | 82                |                    |                      | <i>fabiennequattu</i> |     |       | 2          |
|                         |                   |                    |                      | <i>or</i>             |     |       |            |
| 48.332.A._10N.239.312.A | 48.332.A._10N.V.2 | <i>Nibaviridae</i> | <i>Fabiennevirus</i> | <i>Fabiennevirus</i>  | 282 | 41488 | PRJNA32810 |
| 01.SH1_10N.V.282        | 82                |                    |                      | <i>fabiennequattu</i> |     |       | 2          |
|                         |                   |                    |                      | <i>or</i>             |     |       |            |

|                               |                   |                   |                     |                                           |     |       |                 |
|-------------------------------|-------------------|-------------------|---------------------|-------------------------------------------|-----|-------|-----------------|
| 48.332.B._10N.239.312.A       | 48.332.B._10N.V.2 | Nibaviridae       | Fabiennevirus       | Fabiennevirus                             | 282 | 41488 | PRJNA32810      |
| 01.SH1_10N.V.282              | 82                |                   |                     | fabiennequattu<br>or                      |     |       | 2               |
| 6.332.A._10N.239.312.A0       | 6.332.A._10N.V.23 | Nibaviridae       | Ninavirus           | Ninavirus                                 | 237 | 40889 | PRJNA32810      |
| 1.SH1_10N.V.237               | 7                 |                   |                     | ninaduae                                  |     |       | 2               |
| 7.332.B._10N.239.312.A0       | 7.332.B._10N.V.23 | Nibaviridae       | Ninavirus           | Ninavirus                                 | 239 | 40889 | PRJNA32810      |
| 1.SH1_10N.V.239               | 9                 |                   |                     | ninaduae                                  |     |       | 2               |
| 8.332.A._10N.239.312.A0       | 8.332.A._10N.V.23 | Nibaviridae       | Fabiennevirus       | Fabiennevirus                             | 282 | 41488 | PRJNA32810      |
| 1.SH1_10N.V.282               | 8                 |                   |                     | fabiennequattu<br>or                      |     |       | 2               |
| 8.332.B._10N.239.312.A0       | 8.332.B._10N.V.23 | Nibaviridae       | Ninavirus           | Ninavirus                                 | 238 | 40889 | PRJNA32810      |
| 1.SH1_10N.V.238               | 8                 |                   |                     | ninaduae                                  |     |       | 2               |
| 8.332.C._10N.239.312.A0       | 8.332.C._10N.V.23 | Nibaviridae       | Ninavirus           | Ninavirus                                 | 239 | 40889 | PRJNA32810      |
| 1.SH1_10N.V.239               | 9                 |                   |                     | ninaduae                                  |     |       | 2               |
| 9.332.A._10N.239.312.A0       | 9.332.A._10N.V.23 | Nibaviridae       | Ninavirus           | Ninavirus                                 | 238 | 40889 | PRJNA32810      |
| 1.SH1_10N.V.238               | 8                 |                   |                     | ninaduae                                  |     |       | 2               |
| 9.332.B._10N.239.312.A0       | 9.332.B._10N.V.23 | Nibaviridae       | Ninavirus           | Ninavirus                                 | 238 | 40889 | PRJNA32810      |
| 1.SH1_10N.V.238               | 8                 |                   |                     | ninaduae                                  |     |       | 2               |
| 2.263.O_10N.286.54.F7_10N.255 | 2.263.O_10N.255   | Fatimavirid<br>ae | Sebastianoviru<br>s | Sebastianoviru<br>s<br>sebastianoduo      | 255 | 59340 | PRJNA32810<br>2 |
| 2.263.O_10N.286.54.F7_10N.262 | 2.263.O_10N.262   | Fatimavirid<br>ae | Sebastianoviru<br>s | Sebastianoviru<br>s<br>sebastianounu<br>s | 262 | 59725 | PRJNA32810<br>2 |
| 1.281.O_10N.286.54.F7         | 1.281.O           | Fatimavirid<br>ae | Sebastianoviru<br>s | Sebastianoviru<br>s<br>sebastianounu<br>s | 286 | 59297 | PRJNA32810<br>2 |
| 1.283.A_10N.286.55.A1         | 1.283.A           | Fatimavirid<br>ae | Sebastianoviru<br>s | Sebastianoviru<br>s<br>sebastianotres     | 286 | 59530 | PRJNA32810<br>2 |
| 1.269.O_10N.286.54.A6         | 1.269.O           | Fatimavirid<br>ae | Sebastianoviru<br>s | Sebastianoviru<br>s<br>sebastianoduo      | 286 | 59738 | PRJNA32810<br>2 |
| 1.267.O_10N.286.54.A1         | 1.267.O           | Fatimavirid<br>ae | Sebastianoviru<br>s | Sebastianoviru<br>s                       | 286 | 59414 | PRJNA32810<br>2 |

|                               |                  |                    |                       |                       |     |       |            |
|-------------------------------|------------------|--------------------|-----------------------|-----------------------|-----|-------|------------|
|                               |                  |                    |                       | <i>sebastianounu</i>  |     |       |            |
|                               |                  |                    |                       | <i>s</i>              |     |       |            |
| <b>1.270.A_10N.286.54.A8</b>  | 1.270.A          | <i>Fatimavirid</i> | <i>Sebastianoviru</i> | <i>Sebastianoviru</i> | 286 | 59294 | PRJNA32810 |
|                               |                  | <i>ae</i>          | <i>s</i>              | <i>s</i>              |     |       | 2          |
|                               |                  |                    |                       | <i>sebastianounu</i>  |     |       |            |
|                               |                  |                    |                       | <i>s</i>              |     |       |            |
| <b>1.143.O_10N.261.55.C8</b>  | 1.143.O          | <i>Nibaviridae</i> | <i>Jacobvirus</i>     | <i>Jacobvirus</i>     | 261 | 44527 | PRJNA32810 |
|                               |                  |                    |                       | <i>jacobduo</i>       |     |       | 2          |
| <b>1.127.O_10N.286.52.E12</b> | 1.127.O          | <i>Nibaviridae</i> | <i>Jacobvirus</i>     | <i>Jacobvirus</i>     | 286 | 44915 | PRJNA32810 |
|                               |                  |                    |                       | <i>jacobunus</i>      |     |       | 2          |
| <b>4.233.O_10N.286.52.E12</b> | 4.233.O_10N.V.26 | <i>Nibaviridae</i> | <i>Jacobvirus</i>     | <i>Jacobvirus</i>     | 269 | 44468 | PRJNA32810 |
| <b>_10N.V.269</b>             | 9                |                    |                       | <i>jacobduo</i>       |     |       | 2          |
| <b>7.233.O_10N.286.52.E12</b> | 7.233.O_10N.V.28 | <i>Nibaviridae</i> | <i>Jacobvirus</i>     | <i>Jacobvirus</i>     | 287 | 44915 | PRJNA32810 |
| <b>_10N.V.287</b>             | 7                |                    |                       | <i>jacobunus</i>      |     |       | 2          |
| <b>4.233.O_10N.286.52.E12</b> | 4.233.O_10N.V.29 | <i>Nibaviridae</i> | <i>Jacobvirus</i>     | <i>Jacobvirus</i>     | 290 | 44916 | PRJNA32810 |
| <b>_10N.V.290</b>             | 0                |                    |                       | <i>jacobunus</i>      |     |       | 2          |
